# Supplementary material
Source: bioRxiv or medRxiv preprint supplement (https://medrxiv.org/content/medrxiv/early/2023/10/26/2023.10.19.23297264/DC1/embed/media-1.pdf)
Supplement: Supplementary file [file media-1.pdf]

24-01-2022

Dr. Nousheen Zaidi

Associate Professor

Institute of Microbiology and Molecular Genetics, University of the Punjab.

Dear Dr. Zaidi,

We are pleased to inform you that your research proposal titled “Dynamics of Hepatitis C Virus Seroprevalence: Evaluating Risk Factors among Pakistan's Sex Workers” was approved by the *Bioethics Committee, Cancer Research Centre, University of the Punjab.*

This proposal was evaluated in our committee meeting on January 11, 2022. The following members attend this meeting and evaluated your project’s proposal and associated questionnaire.

**1. Dr. Nazia Jamil**

Associate Professor

Institute of Microbiology & Molecular Genetics, University of the Punjab, Lahore.

**2. Dr. Hina Usman**

Assistant Professor

Department of Microbiology & Molecular Genetics, Multan Women University, Multan.

**3. Dr. Rida Batool**

Assistant Professor

Institute of Microbiology & Molecular Genetics, University of the Punjab, Lahore.

We would like to inform you that this approval is subject to continuous compliance with ethical standards throughout the duration of the research project. We expect you to follow the protocols and guidelines outlined in your proposal. We appreciate your contribution to research and wish you all the success in conducting the study.

Sincerely,

A handwritten signature in purple ink, appearing to read "Rimsha".

**Rimsha Munir**

Coordinator,

Bioethics Committee, Cancer Research Centre, University of the Punjab Lahore.
